# Supplementary material
Source: Elsevier journal article supplement (https://researchonline.lshtm.ac.uk/1701438/1/mmc1.pdf)
Supplement: mmc1 [file mmc1.pdf]

## Supplementary appendix

This appendix formed part of the original submission and has been peer reviewed. We post it as supplied by the authors.

Supplement to: Peck R, Mghamba J, Vanobberghen F, et al. Preparedness of Tanzanian health facilities for outpatient primary care of hypertension and diabetes: a cross-sectional survey. *Lancet Glob Health* 2014; published online April 14. [http://dx.doi.org/10.1016/S2214-109X\(14\)70033-6](http://dx.doi.org/10.1016/S2214-109X(14)70033-6).

## Supplementary Material

**Appendix Table 1.** Characteristics of the 24 health facilities in north-west Tanzania included in the survey.

| Health facility name     | Health facility type         | Health facility ownership | Study strata         | Number of registered staff* |                   |       |           |
|--------------------------|------------------------------|---------------------------|----------------------|-----------------------------|-------------------|-------|-----------|
|                          |                              |                           |                      | MD                          | Non-MD Clinicians | Nurse | Assistant |
| Bugando Medical Center   | Referral hospital (zonal)    | Government & Faith-based  | Mwanza city          | 82                          | 1                 | 395   | 308       |
| Sekou Toure              | Referral hospital (regional) | Government                | Mwanza city          | 11                          | 15                | 168   | 0         |
| Geita Hospital           | District hospital            | Government                | Geita district town  | 6                           | 25                | 110   | 1         |
| Kahama Hospital          | District hospital            | Government                | Kahama district town | 4                           | 27                | 122   | 0         |
| Buzuruga                 | Health center                | Government                | Mwanza city          | 1                           | 6                 | 18    | 2         |
| ELCT Nyakato             | Health center                | Faith-based               | Mwanza city          | 1                           | 4                 | 8     | 0         |
| Kasamwa Health Center    | Health center                | Government                | Geita rural          | 0                           | 1                 | 9     | 1         |
| Nyang'wale Health Center | Health center                | Government                | Geita rural          | 0                           | 2                 | 1     | 0         |
| Nzera Health Center      | Health center                | Government                | Geita rural          | 0                           | 3                 | 9     | 0         |
| Bulungwa Health Center   | Health center                | Government                | Kahama rural         | 0                           | 3                 | 5     | 1         |
| Ushetu Health Center     | Health center                | Government                | Kahama rural         | 0                           | 2                 | 5     | 0         |
| Mpera Health Center      | Health center                | Faith-based               | Kahama rural         | 0                           | 2                 | 2     | 0         |
| Kiloleli Chamwenda       | Dispensary                   | Government                | Mwanza city          | 0                           | 2                 | 3     | 0         |
| Nyakato                  | Dispensary                   | Government                | Mwanza city          | 0                           | 3                 | 6     | 0         |
| KKKT Nyamanoro           | Dispensary                   | Faith-based               | Mwanza city          | 2                           | 1                 | 2     | 1         |
| Nyakahoja                | Dispensary                   | Faith-based               | Mwanza city          | 1                           | 4                 | 5     | 1         |
| TCMC Dispensary          | Dispensary                   | Faith-based               | Geita district town  | 0                           | 2                 | 2     | 0         |
| Bung'wangoko Dispensary  | Dispensary                   | Government                | Geita rural          | 0                           | 0                 | 1     | 0         |
| Busolwa Dispensary       | Dispensary                   | Government                | Geita rural          | 0                           | 1                 | 1     | 0         |
| Fulwe Dispensary         | Dispensary                   | Government                | Geita rural          | 0                           | 1                 | 1     | 0         |
| Mbulu Dispensary         | Dispensary                   | Government                | Kahama district town | 0                           | 2                 | 3     | 0         |
| Idahina Dispensary       | Dispensary                   | Government                | Kahama rural         | 0                           | 1                 | 1     | 0         |
| Isagehe Dispensary       | Dispensary                   | Government                | Kahama rural         | 0                           | 1                 | 2     | 0         |
| Mkwangy Dispensary       | Dispensary                   | Government                | Kahama rural         | 0                           | 1                 | 1     | 0         |

\* Including those who provide outpatient care to adults with chronic diseases (and hence were eligible for completion of our health worker questionnaire) and those who do not provide such care (who were not eligible).

**Appendix Table 2.** SARA health facility questionnaire results from 24 health facilities in north-west Tanzania, by health facility type.

|                                                                   | Referral hospitals (N=2) | District hospitals (N=2) | Urban health centers (N=2) | Rural health centers (N=6) | Urban dispensaries (N=6) | Rural dispensaries (N=6) |
|-------------------------------------------------------------------|--------------------------|--------------------------|----------------------------|----------------------------|--------------------------|--------------------------|
| <b>A. FACILITY SERVICES</b>                                       |                          |                          |                            |                            |                          |                          |
| <b>Provision of care for chronic diseases</b>                     |                          |                          |                            |                            |                          |                          |
| Hypertension                                                      | 2 (100%)                 | 2 (100%)                 | 2 (100%)                   | 5 (83%)                    | 6 (100%)                 | 3 (50%)                  |
| Diabetes mellitus                                                 | 2 (100%)                 | 2 (100%)                 | 2 (100%)                   | 2 (33%)                    | 4 (67%)                  | 1 (17%)                  |
| Heart failure                                                     | 2 (100%)                 | 2 (100%)                 | 1 (50%)                    | 4 (67%)                    | 2 (33%)                  | 1 (17%)                  |
| COPD and asthma                                                   | 2 (100%)                 | 2 (100%)                 | 2 (100%)                   | 5 (83%)                    | 6 (100%)                 | 5 (83%)                  |
| Epilepsy                                                          | 2 (100%)                 | 2 (100%)                 | 2 (100%)                   | 5 (83%)                    | 4 (67%)                  | 5 (83%)                  |
| HIV infection                                                     | 2 (100%)                 | 2 (100%)                 | 2 (100%)                   | 5 (83%)                    | 5 (83%)                  | 1 (17%)                  |
| <b>B. REFERRAL &amp; BACK-REFERRAL</b>                            |                          |                          |                            |                            |                          |                          |
| <b>Routinely refer NCDs</b>                                       |                          |                          |                            |                            |                          |                          |
| Hypertension                                                      |                          |                          |                            |                            |                          |                          |
| Yes, but rarely see                                               | 0                        | 0                        | 1 (50%)                    | 0                          | 1 (17%)                  | 1 (17%)                  |
| Yes, usually refer                                                | 0                        | 0                        | 0                          | 2 (33%)                    | 3 (50%)                  | 5 (83%)                  |
| No, manage here                                                   | 2 (100%)                 | 2 (100%)                 | 1 (50%)                    | 4 (67%)                    | 2 (33%)                  | 0                        |
| Diabetes mellitus                                                 |                          |                          |                            |                            |                          |                          |
| Yes, but rarely see                                               | 0                        | 0                        | 0                          | 2 (33%)                    | 3 (50%)                  | 2 (33%)                  |
| Yes, usually refer                                                | 0                        | 0                        | 2 (100%)                   | 2 (33%)                    | 2 (33%)                  | 4 (67%)                  |
| No, manage here                                                   | 2 (100%)                 | 2 (100%)                 | 0                          | 2 (33%)                    | 1 (17%)                  | 0                        |
| Heart failure                                                     |                          |                          |                            |                            |                          |                          |
| Yes, but rarely see                                               | 0                        | 0                        | 1 (50%)                    | 0                          | 3 (50%)                  | 1 (17%)                  |
| Yes, usually refer                                                | 0                        | 0                        | 1 (50%)                    | 5 (83%)                    | 3 (50%)                  | 5 (83%)                  |
| No, manage here                                                   | 2 (100%)                 | 2 (100%)                 | 0                          | 1 (17%)                    | 0                        | 0                        |
| COPD                                                              |                          |                          |                            |                            |                          |                          |
| Yes, but rarely see                                               | 0                        | 0                        | 0                          | 0                          | 2 (33%)                  | 1 (17%)                  |
| Yes, usually refer                                                | 0                        | 0                        | 0                          | 1 (17%)                    | 1 (17%)                  | 1 (17%)                  |
| No, manage here                                                   | 2 (100%)                 | 2 (100%)                 | 2 (100%)                   | 5 (83%)                    | 3 (50%)                  | 4 (67%)                  |
| Epilepsy                                                          |                          |                          |                            |                            |                          |                          |
| Yes, but rarely see                                               | 0                        | 0                        | 0                          | 0                          | 1 (17%)                  | 1 (17%)                  |
| Yes, usually refer                                                | 0                        | 0                        | 0                          | 0                          | 2 (33%)                  | 1 (17%)                  |
| No, manage here                                                   | 2 (100%)                 | 2 (100%)                 | 2 (100%)                   | 6 (100%)                   | 3 (50%)                  | 4 (67%)                  |
| <b>Total USUALLY refer ANY NCD</b>                                | <b>0</b>                 | <b>0</b>                 | <b>2</b>                   | <b>5</b>                   | <b>4</b>                 | <b>5</b>                 |
| <b>Reasons refer NCDs (among those usually referring any NCD)</b> |                          |                          |                            |                            |                          |                          |
| Lack of trained staff                                             | -                        | -                        | 1 (50%)                    | 5 (100%)                   | 3 (75%)                  | 5 (100%)                 |
| Lack of necessary equipment                                       | -                        | -                        | 2 (100%)                   | 5 (100%)                   | 4 (100%)                 | 5 (100%)                 |
| Lack of drugs                                                     | -                        | -                        | 2 (100%)                   | 5 (100%)                   | 3 (75%)                  | 5 (100%)                 |
| Other reasons <sup>1</sup>                                        | -                        | -                        | 2 (100%)                   | 1 (20%)                    | 2 (50%)                  | 1 (20%)                  |
| <b>Routinely refer for HIV</b>                                    |                          |                          |                            |                            |                          |                          |
| Yes, but rarely see                                               | 0                        | 0                        | 0                          | 0                          | 0                        | 1 (17%)                  |
| Yes, usually refer                                                | 0                        | 0                        | 1 (50%)                    | 1 (17%)                    | 4 (67%)                  | 5 (83%)                  |
| No, manage here                                                   | 2 (100%)                 | 2 (100%)                 | 1 (50%)                    | 5 (83%)                    | 2 (33%)                  | 0                        |
| <b>USUALLY refer for HIV</b>                                      | <b>0</b>                 | <b>0</b>                 | <b>1</b>                   | <b>1</b>                   | <b>4</b>                 | <b>5</b>                 |
| <b>Reasons refer HIV (among those usually referring for HIV)</b>  |                          |                          |                            |                            |                          |                          |
| Lack of trained staff                                             | -                        | -                        | 1 (100%)                   | 1 (100%)                   | 3 (75%)                  | 5 (100%)                 |
| Lack of necessary equipment                                       | -                        | -                        | 1 (100%)                   | 1 (100%)                   | 4 (100%)                 | 5 (100%)                 |

|                                                                                       | Referral hospitals (N=2) | District hospitals (N=2) | Urban health centers (N=2) | Rural health centers (N=6) | Urban dispensaries (N=6) | Rural dispensaries (N=6) |
|---------------------------------------------------------------------------------------|--------------------------|--------------------------|----------------------------|----------------------------|--------------------------|--------------------------|
| Lack of drugs                                                                         | -                        | -                        | 1 (100%)                   | 1 (100%)                   | 4 (100%)                 | 5 (100%)                 |
| Other reasons                                                                         | -                        | -                        | 0                          | 0                          | 0                        | 0                        |
| <b>Get back-referral (among those USUALLY referring for relevant chronic disease)</b> |                          |                          |                            |                            |                          |                          |
| Hypertension                                                                          | -                        | -                        | -                          | 0                          | 0                        | 2 (40%)                  |
| Diabetes mellitus                                                                     | -                        | -                        | 0                          | 0                          | 1 (50%)                  | 1 (25%)                  |
| Heart failure                                                                         | -                        | -                        | 0                          | 0                          | 0                        | 0                        |
| COPD and asthma                                                                       | -                        | -                        | -                          | 0                          | 0                        | 0                        |
| Epilepsy                                                                              | -                        | -                        | -                          | -                          | 0                        | 1 (100%)                 |
| HIV infection                                                                         | -                        | -                        | 0                          | 1 (100%)                   | 2 (50%)                  | 4 (80%)                  |
| <b>C. DRUG SUPPLY</b>                                                                 |                          |                          |                            |                            |                          |                          |
| <b>Experience drug stock-outs</b>                                                     |                          |                          |                            |                            |                          |                          |
| Never                                                                                 | 0                        | 0                        | 1 (50%)                    | 0                          | 0                        | 0                        |
| Occasionally                                                                          | 2 (100%)                 | 1 (50%)                  | 0                          | 4 (67%)                    | 5 (83%)                  | 4 (67%)                  |
| Often                                                                                 | 0                        | 0                        | 1 (50%)                    | 2 (33%)                    | 0                        | 2 (33%)                  |
| Always                                                                                | 0                        | 1 (50%)                  | 0                          | 0                          | 1 (17%)                  | 0                        |
| <b>Usual stock-out duration (among those experiencing)</b>                            |                          |                          |                            |                            |                          |                          |
| <1 week                                                                               | 1 (50%)                  | 1 (50%)                  | 0                          | 0                          | 0                        | 0                        |
| 1 week to <1 month                                                                    | 1 (50%)                  | 0                        | 0                          | 4 (67%)                    | 1 (17%)                  | 4 (67%)                  |
| 1 month or longer                                                                     | 0                        | 1 (50%)                  | 1 (100%)                   | 2 (33%)                    | 5 (83%)                  | 2 (33%)                  |
| <b>D. OUTREACH</b>                                                                    |                          |                          |                            |                            |                          |                          |
| <b>Any outreach activities conducted</b>                                              | 1 (50%)                  | 2 (100%)                 | 1 (50%)                    | 4 (67%)                    | 4 (67%)                  | 6 (100%)                 |
| <b>Type of activity</b>                                                               |                          |                          |                            |                            |                          |                          |
| Health promotion                                                                      | 1 (50%)                  | 2 (100%)                 | 1 (50%)                    | 4 (67%)                    | 4 (67%)                  | 6 (100%)                 |
| Disease screening                                                                     | 1 (50%)                  | 2 (100%)                 | 1 (50%)                    | 2 (33%)                    | 1 (17%)                  | 0                        |
| Curative services                                                                     | 1 (50%)                  | 1 (50%)                  | 0                          | 0                          | 0                        | 1 (17%)                  |
| <b>Chronic diseases specifically targeted</b>                                         |                          |                          |                            |                            |                          |                          |
| Hypertension                                                                          | 1 (50%)                  | 0                        | 0                          | 0                          | 0                        | 0                        |
| Diabetes mellitus                                                                     | 1 (50%)                  | 0                        | 0                          | 0                          | 0                        | 0                        |
| Heart failure                                                                         | 1 (50%)                  | 0                        | 0                          | 0                          | 0                        | 0                        |
| COPD and asthma                                                                       | 1 (50%)                  | 0                        | 0                          | 0                          | 0                        | 0                        |
| Epilepsy                                                                              | 1 (50%)                  | 0                        | 0                          | 0                          | 0                        | 0                        |
| HIV infection                                                                         | 1 (50%)                  | 1 (50%)                  | 1 (50%)                    | 0                          | 2 (33%)                  | 1 (17%)                  |
| <b>Difficulties in outreach planning or implementation (of those who conduct any)</b> | 1 (100%)                 | 2 (100%)                 | 1 (100%)                   | 4 (100%)                   | 4 (100%)                 | 6 (100%)                 |
| Insufficient staff/time                                                               | 1 (100%)                 | 2 (100%)                 | 1 (100%)                   | 4 (100%)                   | 1 (25%)                  | 6 (100%)                 |
| Insufficient funds                                                                    | 1 (100%)                 | 1 (50%)                  | 1 (100%)                   | 4 (100%)                   | 4 (100%)                 | 5 (83%)                  |
| Lack of transport                                                                     | 0                        | 2 (100%)                 | 1 (100%)                   | 4 (100%)                   | 4 (100%)                 | 6 (100%)                 |
| Lack of equipment                                                                     | 0                        | 2 (100%)                 | 0                          | 3 (75%)                    | 1 (25%)                  | 4 (67%)                  |
| Lack of drugs                                                                         | 0                        | 2 (100%)                 | 1 (100%)                   | 4 (100%)                   | 1 (25%)                  | 3 (50%)                  |
| Staff insufficiently trained                                                          | 0                        | 2 (100%)                 | 1 (100%)                   | 3 (75%)                    | 1 (25%)                  | 5 (83%)                  |
| Other reasons <sup>2</sup>                                                            | 0                        | 1 (50%)                  | 0                          | 2 (50%)                    | 2 (50%)                  | 1 (17%)                  |
| <b>E. MONITORING AND SUPERVISORY VISITS</b>                                           |                          |                          |                            |                            |                          |                          |
| <b>Time since HIV monitoring or supervisory visit</b>                                 |                          |                          |                            |                            |                          |                          |
| Within last 3 months                                                                  | 2 (100%)                 | 2 (100%)                 | 1 (50%)                    | 5 (83%)                    | 1 (17%)                  | 2 (33%)                  |
| >3 months but <1 year                                                                 | 0                        | 0                        | 0                          | 0                          | 3 (50%)                  | 0                        |

|                                                                         | Referral hospitals (N=2) | District hospitals (N=2) | Urban health centers (N=2) | Rural health centers (N=6) | Urban dispensaries (N=6) | Rural dispensaries (N=6) |
|-------------------------------------------------------------------------|--------------------------|--------------------------|----------------------------|----------------------------|--------------------------|--------------------------|
| ≥1 year                                                                 | 0                        | 0                        | 0                          | 0                          | 0                        | 0                        |
| Never                                                                   | 0                        | 0                        | 0                          | 0                          | 2 (33%)                  | 1 (17%)                  |
| No HIV services                                                         | 0                        | 0                        | 1 (50%)                    | 1 (17%)                    | 0                        | 3 (50%)                  |
| <b>Time since other chronic disease monitoring or supervisory visit</b> |                          |                          |                            |                            |                          |                          |
| Within last 3 months                                                    | 0                        | 0                        | 1 (50%)                    | 2 (33%)                    | 0                        | 2 (33%)                  |
| >3 months but <1 year                                                   | 1 (50%)                  | 0                        | 0                          | 0                          | 1 (17%)                  | 0                        |
| ≥1 year                                                                 | 0                        | 2 (100%)                 | 0                          | 0                          | 0                        | 0                        |
| Never                                                                   | 1 (50%)                  | 0                        | 1 (50%)                    | 4 (67%)                    | 5 (83%)                  | 1 (17%)                  |
| No chronic disease services                                             | 0                        | 0                        | 0                          | 0                          | 0                        | 3 (50%)                  |
| <b>STAFFING</b>                                                         |                          |                          |                            |                            |                          |                          |
| <b>F. Number of staff assigned</b>                                      |                          |                          |                            |                            |                          |                          |
| <b>MDs</b>                                                              |                          |                          |                            |                            |                          |                          |
| None                                                                    | 0                        | 0                        | 0                          | 6 (100%)                   | 4 (67%)                  | 6 (100%)                 |
| 1-2                                                                     | 0                        | 0                        | 2 (100%)                   | 0                          | 2 (33%)                  | 0                        |
| 3+                                                                      | 2 (100%)                 | 2 (100%)                 | 0                          | 0                          | 0                        | 0                        |
| <b>Non-MD clinicians</b>                                                |                          |                          |                            |                            |                          |                          |
| None                                                                    | 0                        | 0                        | 0                          | 0                          | 0                        | 1 (17%)                  |
| 1-2                                                                     | 1 (50)                   | 0                        | 0                          | 4 (67%)                    | 4 (67%)                  | 5 (83%)                  |
| 3+                                                                      | 1 (50%)                  | 2 (100%)                 | 2 (100%)                   | 2 (33%)                    | 2 (33%)                  | 0                        |
| <b>Nurses</b>                                                           |                          |                          |                            |                            |                          |                          |
| None                                                                    | 0                        | 0                        | 0                          | 0                          | 0                        | 0                        |
| 1-2                                                                     | 0                        | 0                        | 0                          | 2 (33%)                    | 2 (33%)                  | 6 (100%)                 |
| 3+                                                                      | 2 (100%)                 | 2 (100%)                 | 2 (100%)                   | 4 (67%)                    | 4 (67%)                  | 0                        |
| <b>Clinical assistants</b>                                              |                          |                          |                            |                            |                          |                          |
| None                                                                    | 1 (50%)                  | 1 (50%)                  | 1 (50%)                    | 4 (67%)                    | 4 (67%)                  | 6 (100%)                 |
| 1-2                                                                     | 0                        | 1 (50%)                  | 1 (50%)                    | 2 (33%)                    | 2 (33%)                  | 0                        |
| 3+                                                                      | 1 (50%)                  | 0                        | 0                          | 0                          | 0                        | 0                        |
| <b>Laboratory staff</b>                                                 |                          |                          |                            |                            |                          |                          |
| None                                                                    | 0                        | 0                        | 0                          | 1 (17%)                    | 2 (33%)                  | 6 (100%)                 |
| 1-2                                                                     | 0                        | 0                        | 2 (100%)                   | 4 (67%)                    | 3 (50%)                  | 0                        |
| 3+                                                                      | 2 (100%)                 | 2 (100%)                 | 0                          | 1 (17%)                    | 1 (17%)                  | 0                        |
| <b>Pharmacy staff</b>                                                   |                          |                          |                            |                            |                          |                          |
| None                                                                    | 0                        | 0                        | 1 (50%)                    | 5 (83%)                    | 6 (100%)                 | 6 (100%)                 |
| 1-2                                                                     | 0                        | 0                        | 1 (50%)                    | 1 (17%)                    | 0                        | 0                        |
| 3+                                                                      | 2 (100%)                 | 2 (100%)                 | 0                          | 0                          | 0                        | 0                        |
| <b>Other</b>                                                            |                          |                          |                            |                            |                          |                          |
| None                                                                    | 0                        | 0                        | 0                          | 0                          | 0                        | 0                        |
| 1-2                                                                     | 0                        | 0                        | 0                          | 0                          | 0                        | 5 (83%)                  |
| 3+                                                                      | 2 (100%)                 | 2 (100%)                 | 2 (100%)                   | 6 (100%)                   | 6 (100%)                 | 1 (17%)                  |
| <b>G. SERVICE READINESS</b>                                             |                          |                          |                            |                            |                          |                          |
| <b>Communications</b>                                                   |                          |                          |                            |                            |                          |                          |
| Landline or cellular available                                          | 2 (100%)                 | 2 (100%)                 | 2 (100%)                   | 4 (67%)                    | 6 (100%)                 | 3 (50%)                  |
| Short-wave radio available                                              | 1 (50%)                  | 0                        | 0                          | 0                          | 0                        | 0                        |
| Functioning computer                                                    | 2 (100%)                 | 2 (100%)                 | 2 (100%)                   | 1 (17%)                    | 2 (33%)                  | 0                        |
| Access to email or internet                                             | 2 (100%)                 | 0                        | 1 (50%)                    | 0                          | 2 (33%)                  | 0                        |
| <b>Ambulance service</b>                                                |                          |                          |                            |                            |                          |                          |
| Any service available                                                   | 2 (100%)                 | 2 (100%)                 | 2 (100%)                   | 6 (100%)                   | 3 (50%)                  | 6 (100%)                 |
| Any functional service                                                  | 2 (100%)                 | 2 (100%)                 | 2 (100%)                   | 6 (100%)                   | 3 (50%)                  | 6 (100%)                 |
| <b>Environmental health</b>                                             |                          |                          |                            |                            |                          |                          |
| Running water                                                           |                          |                          |                            |                            |                          |                          |
| Always                                                                  | 1 (100%)                 | 0                        | 0                          | 0                          | 2 (33%)                  | 0                        |
| Mostly                                                                  | 1 (50%)                  | 2 (100%)                 | 2 (100%)                   | 0                          | 1 (17%)                  | 1 (17%)                  |
| Rarely                                                                  | 0                        | 0                        | 0                          | 0                          | 2 (33%)                  | 0                        |

|                                                 | Referral hospitals (N=2) | District hospitals (N=2) | Urban health centers (N=2) | Rural health centers (N=6) | Urban dispensaries (N=6) | Rural dispensaries (N=6) |
|-------------------------------------------------|--------------------------|--------------------------|----------------------------|----------------------------|--------------------------|--------------------------|
| Never                                           | 0                        | 0                        | 0                          | 6 (100%)                   | 1 (17%)                  | 5 (83%)                  |
| Waiting area                                    | 2 (100%)                 | 1 (50%)                  | 2 (100%)                   | 5 (83%)                    | 4 (67%)                  | 2 (40%)                  |
| Toilet for general OPD use                      | 2 (100%)                 | 2 (100%)                 | 2 (100%)                   | 3 (50%)                    | 6 (100%)                 | 3 (50%)                  |
| <b>H. PROVISION OF CARE IN OPD</b>              |                          |                          |                            |                            |                          |                          |
| <b>Hypertension</b>                             |                          |                          |                            |                            |                          |                          |
| Diagnose                                        | 2 (100%)                 | 2 (100%)                 | 2 (100%)                   | 6 (100%)                   | 6 (100%)                 | 6 (100%)                 |
| Manage                                          | 2 (100%)                 | 2 (100%)                 | 2 (100%)                   | 4 (67%)                    | 5 (83%)                  | 2 (33%)                  |
| Received training                               |                          |                          |                            |                            |                          |                          |
| Yes, within last 2 years                        | 1 (50%)                  | 0                        | 0                          | 0                          | 0                        | 0                        |
| Yes, before that                                | 0                        | 0                        | 0                          | 0                          | 0                        | 0                        |
| Never                                           | 1 (50%)                  | 2 (100%)                 | 2 (100%)                   | 6 (100%)                   | 6 (100%)                 | 6 (100%)                 |
| <b>Diabetes mellitus</b>                        |                          |                          |                            |                            |                          |                          |
| Diagnose                                        | 2 (100%)                 | 2 (100%)                 | 1 (50%)                    | 5 (83%)                    | 6 (100%)                 | 4 (67%)                  |
| How diagnose (of those who diagnose):           |                          |                          |                            |                            |                          |                          |
| Symptoms                                        | 0                        | 0                        | 0                          | 2 (40%)                    | 2 (33%)                  | 4 (100%)                 |
| Mostly lab tests in symptomatic pts             | 1 (50%)                  | 0                        | 0                          | 0                          | 0                        | 0                        |
| Lab test in symptomatic pts AND screening tests | 1 (50%)                  | 2 (100%)                 | 1 (100%)                   | 3 (60%)                    | 4 (67%)                  | 0                        |
| I don't know                                    | 0                        | 0                        | 0                          | 0                          | 0                        | 0                        |
| Manage                                          | 2 (100%)                 | 2 (100%)                 | 1 (50%)                    | 3 (50%)                    | 4 (67%)                  | 0                        |
| Received training                               |                          |                          |                            |                            |                          |                          |
| Yes, within last 2 years                        | 1 (50%)                  | 0                        | 0                          | 0                          | 0                        | 0                        |
| Yes, before that                                | 0                        | 1 (50%)                  | 0                          | 0                          | 0                        | 0                        |
| Never                                           | 1 (50%)                  | 1 (50%)                  | 2 (100%)                   | 6 (100%)                   | 6 (100%)                 | 6 (100%) <sup>4</sup>    |
| <b>Heart failure</b>                            |                          |                          |                            |                            |                          |                          |
| Diagnose                                        | 2 (100%)                 | 2 (100%)                 | 2 (100%)                   | 6 (100%)                   | 6 (100%)                 | 3 (50%)                  |
| Manage                                          | 2 (100%)                 | 2 (100%)                 | 0                          | 1 (17%)                    | 1 (17%)                  | 0                        |
| Received training                               |                          |                          |                            |                            |                          |                          |
| Yes, within last 2 years                        | 1 (50%)                  | 0                        | 0                          | 0                          | 0                        | 0                        |
| Yes, before that                                | 0                        | 0                        | 0                          | 0                          | 0                        | 0                        |
| Never                                           | 1 (50%)                  | 2 (100%)                 | 2 (100%)                   | 6 (100%)                   | 6 (100%)                 | 6 (100%)                 |
| <b>COPD and asthma</b>                          |                          |                          |                            |                            |                          |                          |
| Diagnose                                        | 2 (100%)                 | 2 (100%)                 | 2 (100%)                   | 6 (100%)                   | 6 (100%)                 | 5 (83%)                  |
| Manage                                          | 2 (100%)                 | 2 (100%)                 | 2 (100%)                   | 5 (83%)                    | 6 (100%)                 | 5 (83%)                  |
| Received training                               |                          |                          |                            |                            |                          |                          |
| Yes, within last 2 years                        | 1 (50%)                  | 0                        | 0                          | 0                          | 0                        | 0                        |
| Yes, before that                                | 0                        | 0                        | 0                          | 0                          | 0                        | 0                        |
| Never                                           | 1 (50%)                  | 2 (100%)                 | 2 (100%)                   | 6 (100%)                   | 6 (100%)                 | 6 (100%)                 |
| <b>Epilepsy</b>                                 |                          |                          |                            |                            |                          |                          |
| Diagnose                                        | 2 (100%)                 | 2 (100%)                 | 2 (100%)                   | 6 (100%)                   | 6 (100%)                 | 6 (100%)                 |
| Manage                                          | 2 (100%)                 | 2 (100%)                 | 2 (100%)                   | 6 (100%)                   | 5 (83%)                  | 6 (100%)                 |
| Received training                               |                          |                          |                            |                            |                          |                          |
| Yes, within last 2 years                        | 1 (50%)                  | 0                        | 1 (50%)                    | 0                          | 0                        | 0                        |
| Yes, before that                                | 0                        | 0                        | 0                          | 2 (33%)                    | 0                        | 1 (17%)                  |
| Never                                           | 1 (50%)                  | 2 (100%)                 | 1 (50%)                    | 4 (67%)                    | 6 (100%)                 | 5 (83%)                  |

|                                                                                                            | Referral hospitals (N=2) | District hospitals (N=2) | Urban health centers (N=2) | Rural health centers (N=6) | Urban dispensaries (N=6) | Rural dispensaries (N=6) |
|------------------------------------------------------------------------------------------------------------|--------------------------|--------------------------|----------------------------|----------------------------|--------------------------|--------------------------|
| <b>HIV infection</b>                                                                                       |                          |                          |                            |                            |                          |                          |
| Diagnose                                                                                                   | 2 (100%)                 | 2 (100%)                 | 2 (100%)                   | 6 (100%)                   | 5 (83%)                  | 5 (83%)                  |
| Manage                                                                                                     | 1 (50%)                  | 0                        | 0                          | 5 (83%)                    | 2 (33%)                  | 1 (17%)                  |
| Received training                                                                                          |                          |                          |                            |                            |                          |                          |
| Yes, within last 2 years                                                                                   | 1 (50%)                  | 0                        | 0                          | 2 (33%)                    | 2 (33%)                  | 2 (33%)                  |
| Yes, before that                                                                                           | 0                        | 2 (100%)                 | 1 (50%)                    | 4 (67%)                    | 1 (17%)                  | 3 (50%)                  |
| Never                                                                                                      | 1 (100%)                 | 0                        | 1 (50%)                    | 0                          | 3 (50%)                  | 1 (17%)                  |
| <b>I. NATIONAL GUIDELINES IN OPD</b>                                                                       |                          |                          |                            |                            |                          |                          |
| <b>Have guidelines for HIV care (in OPD or CTC)</b>                                                        |                          |                          |                            |                            |                          |                          |
| Yes, observed                                                                                              | 2 (100%)                 | 2 (100%)                 | 0                          | 5 (83%)                    | 1 (17%)                  | 0                        |
| Yes, reported not seen                                                                                     | 0                        | 0                        | 1 (50%)                    | 0                          | 0                        | 1 (17%)                  |
| No                                                                                                         | 0                        | 0                        | 1 (50%)                    | 1 (17%)                    | 5 (83%)                  | 5 (83%)                  |
| <b>Guidelines in OPD</b>                                                                                   | <b>1</b>                 | <b>0</b>                 | <b>0</b>                   | <b>3</b>                   | <b>1</b>                 | <b>1</b>                 |
| <b>Guidelines for HIV usually followed (of those with guidelines in OPD)</b>                               |                          |                          |                            |                            |                          |                          |
| Majority of service providers follow the guidelines without problems                                       | 1 (100%)                 | -                        | -                          | 1 (33%)                    | 1 (100%)                 | 0                        |
| Guidelines can sometimes not be followed because of lack of equipment, supplies, training or other reasons | 0                        | -                        | -                          | 2 (67%)                    | 0                        | 1 (100%)                 |
| Guidelines can usually not be followed because of lack of equipment, supplies or training or other reasons | 0                        | -                        | -                          | 0                          | 0                        | 0                        |
| <b>Have guidelines for chronic diseases</b>                                                                |                          |                          |                            |                            |                          |                          |
| Yes, observed                                                                                              | 0                        | 0                        | 0                          | 0                          | 3 (50%)                  | 0                        |
| Yes, reported not seen                                                                                     | 0                        | 0                        | 0                          | 0                          | 0                        | 0                        |
| No                                                                                                         | 2 (100%)                 | 2 (100%)                 | 2 (100%)                   | 6 (100%)                   | 3 (50%)                  | 6 (100%)                 |
| <b>NCD guidelines include (observed; of those with guidelines):</b>                                        |                          |                          |                            |                            |                          |                          |
| Hypertension                                                                                               | -                        | -                        | -                          | -                          | 3 (100%)                 | -                        |
| Diabetes mellitus                                                                                          | -                        | -                        | -                          | -                          | 3 (100%)                 | -                        |
| Heart failure                                                                                              | -                        | -                        | -                          | -                          | 3 (100%)                 | -                        |
| COPD                                                                                                       | -                        | -                        | -                          | -                          | 3 (100%)                 | -                        |
| Epilepsy                                                                                                   | -                        | -                        | -                          | -                          | 3 (100%)                 | -                        |
| <b>Guidelines for NCDs usually followed (of those with guidelines)</b>                                     |                          |                          |                            |                            |                          |                          |
| Majority of service providers follow the guidelines without problems                                       | -                        | -                        | -                          | -                          | 1 (33%)                  | -                        |
| Guidelines can sometimes not be followed because of lack of equipment, supplies, training or other reasons | -                        | -                        | -                          | -                          | 2 (67%)                  | -                        |
| Guidelines can usually not be followed because of lack of equipment, supplies or training or other reasons | -                        | -                        | -                          | -                          | 0                        | -                        |
| <b>J. EQUIPMENT IN OPD</b>                                                                                 |                          |                          |                            |                            |                          |                          |

|                                                   | Referral hospitals (N=2) | District hospitals (N=2) | Urban health centers (N=2) | Rural health centers (N=6) | Urban dispensaries (N=6) | Rural dispensaries (N=6) |
|---------------------------------------------------|--------------------------|--------------------------|----------------------------|----------------------------|--------------------------|--------------------------|
| <b>Available and functioning:</b>                 |                          |                          |                            |                            |                          |                          |
| Weighing scale                                    | 2 (100%)                 | 1 (50%)                  | 1 (50%)                    | 5 (83%)                    | 5 (83%)                  | 3 (50%)                  |
| Height measurement device                         | 1 (50%)                  | 2 (100%)                 | 1 (50%)                    | 1 (17%)                    | 0                        | 4 (67%)                  |
| Thermometer                                       | 2 (100%)                 | 0                        | 2 (100%)                   | 3 (50%)                    | 5 (83%)                  | 4 (67%)                  |
| Stethoscope                                       | 2 (100%)                 | 2 (100%)                 | 2 (100%)                   | 5 (83%)                    | 6 (100%)                 | 6 (100%)                 |
| Blood pressure measurement device                 | 1 (50%)                  | 2 (100%)                 | 1 (50%)                    | 4 (67%)                    | 5 (83%)                  | 3 (83%)                  |
| Glucometer                                        | 2 (100%)                 | 0                        | 0                          | 1 (17%)                    | 1 (17%)                  | 0                        |
| Guedel tube or tongue protector                   | 1 (50%)                  | 0                        | 0                          | 0                          | 2 (33%)                  | 0                        |
| <b>K. RECORDING SYSTEM IN OPD</b>                 |                          |                          |                            |                            |                          |                          |
| <b>Daily visits in general OPD service</b>        |                          |                          |                            |                            |                          |                          |
| Names recorded                                    |                          |                          |                            |                            |                          |                          |
| Always                                            | 1 (50%)                  | 0                        | 2 (100%)                   | 3 (50%)                    | 4 (67%)                  | 1 (17%)                  |
| Mostly                                            | 0                        | 0                        | 0                          | 2 (33%)                    | 2 (33%)                  | 2 (33%)                  |
| Rarely                                            | 1 (50%)                  | 2 (100%)                 | 0                          | 1 (17%)                    | 0                        | 2 (33%)                  |
| Never                                             | 0                        | 0                        | 0                          | 0                          | 0                        | 1 (17%)                  |
| Diagnosis recorded                                |                          |                          |                            |                            |                          |                          |
| Always                                            | 0                        | 0                        | 2 (100%)                   | 2 (33%)                    | 1 (17%)                  | 1 (17%)                  |
| Mostly                                            | 2 (100%)                 | 0                        | 0                          | 3 (50%)                    | 4 (67%)                  | 2 (33%)                  |
| Rarely                                            | 0                        | 2 (100%)                 | 0                          | 1 (17%)                    | 1 (17%)                  | 2 (33%)                  |
| Never                                             | 0                        | 0                        | 0                          | 0                          | 0                        | 1 (17%)                  |
| Records readable & understandable                 |                          |                          |                            |                            |                          |                          |
| Always                                            | 0                        | 0                        | 0                          | 0                          | 2 (33%)                  | 0                        |
| Mostly                                            | 1 (50%)                  | 1 (50%)                  | 2 (100%)                   | 6 (100%)                   | 3 (50%)                  | 4 (67%)                  |
| Rarely                                            | 1 (50%)                  | 1 (50%)                  | 0                          | 0                          | 1 (17%)                  | 1 (17%)                  |
| Never                                             | 0                        | 0                        | 0                          | 0                          | 0                        | 1 (17%)                  |
| <b>L. ANC SERVICES</b>                            |                          |                          |                            |                            |                          |                          |
| <b>ANC services offered</b>                       | 1 (50%)                  | 2 (100%)                 | 1 (50%)                    | 6 (100%)                   | 4 (67%)                  | 6 (100%)                 |
| <b>PMTCT services offered</b>                     | 2 (100%)                 | 2 (100%)                 | 1 (50%)                    | 6 (100%)                   | 4 (67%)                  | 5 (83%)                  |
| <b>M. HIV COUNSELLING AND TESTING</b>             |                          |                          |                            |                            |                          |                          |
| <b>HIV counselling and testing provided</b>       | 2 (100%)                 | 2 (100%)                 | 1 (50%)                    | 5 (83%)                    | 4 (67%)                  | 4 (67%)                  |
| <b>Rapid tests available (at least one valid)</b> |                          |                          |                            |                            |                          |                          |
| Screening                                         | 2 (100%)                 | 2 (100%)                 | 0                          | 2 (40%)                    | 2 (50%)                  | 2 (50%)                  |
| Confirmatory                                      | 2 (100%)                 | 2 (100%)                 | 0                          | 2 (40%)                    | 2 (50%)                  | 3 (75%)                  |
| Tie-breaker                                       | 0                        | 0                        | 0                          | 0                          | 0                        | 0                        |
| <b>N. HIV TREATMENT</b>                           |                          |                          |                            |                            |                          |                          |
| <b>HIV treatment services offered</b>             | 2 (100%)                 | 2 (100%)                 | 1 (50%)                    | 5 (83%)                    | 1 (17%)                  | 0                        |
| <i>Of those offering services:</i>                |                          |                          |                            |                            |                          |                          |
| <b>Prescribe OI treatment</b>                     | 2 (100%)                 | 2 (100%)                 | 1 (100%)                   | 5 (100%)                   | 1 (100%)                 | -                        |
| <b>Prescribe OI prophylaxis</b>                   | 2 (100%)                 | 2 (100%)                 | 1 (100%)                   | 5 (100%)                   | 1 (100%)                 | -                        |
| <b>Prescribe ART</b>                              | 2 (100%)                 | 2 (100%)                 | 1 (100%)                   | 5 (100%)                   | 1 (100%)                 | -                        |
| <b>Stock ART</b>                                  | 2 (100%)                 | 2 (100%)                 | 1 (100%)                   | 5 (100%)                   | 1 (100%)                 | -                        |
| <b>Stock other medicines (eg cotrimoxazole)</b>   | 2 (100%)                 | 2 (100%)                 | 0                          | 4 (80%)                    | 1 (100%)                 | -                        |
| <b>Stock TB medicines</b>                         | 2 (100%)                 | 1 (50%)                  | 1 (100%)                   | 5 (100%)                   | 1 (100%)                 | -                        |
| <b>Patient names recorded</b>                     |                          |                          |                            |                            |                          |                          |
| Always                                            | 2 (100%)                 | 1 (50%)                  | 1 (100%)                   | 5 (100%)                   | 0                        | -                        |
| Mostly                                            | 0                        | 1 (50%)                  | 0                          | 0                          | 0                        | -                        |
| Rarely                                            | 0                        | 0                        | 0                          | 0                          | 0                        | -                        |
| Never                                             | 0                        | 0                        | 0                          | 0                          | 1 (100%)                 | -                        |
| <b>Records understandable</b>                     |                          |                          |                            |                            |                          |                          |
| Always                                            | 2 (100%)                 | 2 (100%)                 | 1 (100%)                   | 5 (100%)                   | 0                        | -                        |

|                                                                               | Referral hospitals (N=2) | District hospitals (N=2) | Urban health centers (N=2) | Rural health centers (N=6) | Urban dispensaries (N=6) | Rural dispensaries (N=6) |
|-------------------------------------------------------------------------------|--------------------------|--------------------------|----------------------------|----------------------------|--------------------------|--------------------------|
| Mostly                                                                        | 0                        | 0                        | 0                          | 0                          | 0                        | -                        |
| Rarely                                                                        | 0                        | 0                        | 0                          | 0                          | 0                        | -                        |
| Never                                                                         | 0                        | 0                        | 0                          | 0                          | 1 (100%)                 | -                        |
| <b>O. LABORATORY</b>                                                          |                          |                          |                            |                            |                          |                          |
| <b>Diagnostic services offered</b>                                            | 2 (100%)                 | 2 (100%)                 | 2 (100%)                   | 6 (100%)                   | 6 (100%)                 | 2 (33%)                  |
| <i>Of those who offer diagnostic services:</i>                                |                          |                          |                            |                            |                          |                          |
| <b>Glucometer available</b>                                                   | 2 (100%)                 | 1 (50%)                  | 1 (50%)                    | 3 (50%)                    | 3 (50%)                  | 0                        |
| <b>Glucometer functioning (of those with)</b>                                 |                          |                          |                            |                            |                          |                          |
| Never                                                                         | 1 (50%)                  | 0                        | 0                          | 1 (33%)                    | 0                        | -                        |
| Occasionally                                                                  | 0                        | 0                        | 0                          | 1 (33%)                    | 1 (33%)                  | -                        |
| Always                                                                        | 1 (50%)                  | 1 (100%)                 | 1 (100%)                   | 1 (33%)                    | 2 (67%)                  | -                        |
| <b>Use urine protein dipstick tests</b>                                       | 2 (100%)                 | 2 (100%)                 | 2 (100%)                   | 6 (100%)                   | 4 (67%)                  | 1 (50%)                  |
| <b>Use urine glucose dipstick tests</b>                                       | 2 (100%)                 | 2 (100%)                 | 2 (100%)                   | 6 (100%)                   | 4 (67%)                  | 1 (50%)                  |
| <b>Ever experience stock-outs of urine glucose dipsticks (of those using)</b> |                          |                          |                            |                            |                          |                          |
| Never                                                                         | 1 (50%)                  | 0                        | 1 (50%)                    | 1 (17%)                    | 2 (50%)                  | 1 (100%)                 |
| Occasionally                                                                  | 1 (50%)                  | 2 (100%)                 | 0                          | 3 (50%)                    | 1 (25%)                  | 0                        |
| Often                                                                         | 0                        | 0                        | 0                          | 2 (33%)                    | 1 (25%)                  | 0                        |
| Always                                                                        | 0                        | 0                        | 1 (50%)                    | 0                          | 0                        | 0                        |
| <b>Do creatinine testing</b>                                                  | 2 (100%)                 | 2 (100%)                 | 0                          | 0                          | 1 (17%)                  | 0                        |
| <b>CD4 counter available</b>                                                  | 2 (100%)                 | 2 (100%)                 | 0                          | 3 (50%)                    | 0                        | 0                        |
| <b>CD4 counting functioning (of those with)</b>                               |                          |                          |                            |                            |                          |                          |
| Occasionally                                                                  | 1 (50%)                  | 1 (50%)                  | -                          | 0                          | -                        | -                        |
| Always                                                                        | 1 (50%)                  | 1 (50%)                  | -                          | 3 (100%)                   | -                        | -                        |
| <b>Ever have CD4 assay kits stock outs (of those with counter)</b>            |                          |                          |                            |                            |                          |                          |
| Never                                                                         | 1 (50%)                  | 0                        | -                          | 1 (33%)                    | -                        | -                        |
| Occasionally                                                                  | 1 (50%)                  | 1 (50%)                  | -                          | 1 (33%)                    | -                        | -                        |
| Often                                                                         | 0                        | 0                        | -                          | 1 (33%)                    | -                        | -                        |
| Always                                                                        | 0                        | 1 (50%)                  | -                          | 0                          | -                        | -                        |
| <b>Microscope for sputum smears available</b>                                 | 2 (100%)                 | 2 (100%)                 | 1 (50%)                    | 5 (83%)                    | 2 (33%)                  | 0                        |
| <b>Microscope functioning (of those with)</b>                                 |                          |                          |                            |                            |                          |                          |
| Often                                                                         | 0                        | 0                        | 0                          | 0                          | 1 (50%)                  | -                        |
| Always                                                                        | 2 (100%)                 | 2 (100%)                 | 1 (100%)                   | 5 (100%)                   | 1 (50%)                  | -                        |
| <b>P. IMAGING SERVICES</b>                                                    |                          |                          |                            |                            |                          |                          |
| <b>Perform diagnostic x-rays, ultrasound or CT?</b>                           | 2 (100%)                 | 2 (100%)                 | 1 (50%)                    | 0                          | 1 (17%)                  | 0                        |
| <b>Available and functioning:</b>                                             |                          |                          |                            |                            |                          |                          |
| X-ray machine                                                                 | 2 (100%)                 | 2 (100%)                 | 0                          | 0                          | 0                        | 0                        |
| Ultrasound equipment                                                          | 2 (100%)                 | 1 (50%)                  | 1 (50%)                    | 0                          | 1 (17%)                  | 0                        |

|                                           | Referral hospitals (N=2) | District hospitals (N=2) | Urban health centers (N=2) | Rural health centers (N=6) | Urban dispensaries (N=6) | Rural dispensaries (N=6) |
|-------------------------------------------|--------------------------|--------------------------|----------------------------|----------------------------|--------------------------|--------------------------|
| ECG                                       | 1 (50%)                  | 0                        | 1 (50%)                    | 0                          | 0                        | 0                        |
| <b>Q. PHARMACY</b>                        |                          |                          |                            |                            |                          |                          |
| <b>Observed available and valid:</b>      |                          |                          |                            |                            |                          |                          |
| Metformin                                 | 2 (100%)                 | 2 (100%)                 | 1 (50%)                    | 0                          | 3 (50%)                  | 0                        |
| Insulin short acting                      | 2 (100%)                 | 2 (100%)                 | 0                          | 0                          | 0                        | 0                        |
| Insulin intermediate acting               | 2 (100%)                 | 0                        | 0                          | 0                          | 0                        | 0                        |
| Insulin long acting                       | 1 (50%)                  | 1 (50%)                  | 0                          | 0                          | 0                        | 0                        |
| Captopril or lisinopril tab               | 1 (50%)                  | 0                        | 1 (50%)                    | 0                          | 4 (67%)                  | 0                        |
| Nifedipine tab                            | 2 (100%)                 | 1 (50%)                  | 1 (50%)                    | 0                          | 4 (67%)                  | 0                        |
| Atenolol or propranolol tab               | 2 (100%)                 | 2 (100%)                 | 1 (50%)                    | 2 (33%)                    | 5 (83%)                  | 0                        |
| Hydrochlorothiazide or Bendrofluazone tab | 2 (100%)                 | 1 (50%)                  | 1 (50%)                    | 1 (17%)                    | 2 (33%)                  | 1 (17%)                  |
| Acetylsalicylic acid                      | 2 (100%)                 | 1 (50%)                  | 2 (100%)                   | 6 (100%)                   | 5 (83%)                  | 6 (100%)                 |
| Salbutamol inhaler                        | 0                        | 0                        | 1 (50%)                    | 0                          | 0                        | 0                        |
| Phenobarbitone tab                        | 2 (100%)                 | 2 (100%)                 | 2 (100%)                   | 4 (67%)                    | 4 (67%)                  | 3 (60%)                  |
| HIV first line therapy <sup>3</sup>       | 2 (100%)                 | 2 (100%)                 | 1 (50%)                    | 5 (83%)                    | 1 (17%)                  | 0                        |

Note: a few results are missing for some health facilities; percentages are of complete data. COPD=chronic obstructive lung disease. NCD=non-communicable disease. OPD=outpatient department. CTC=HIV care and treatment clinic. ANC=antenatal care. PMTCT=prevention of mother to child transmission. OI=opportunistic infection. ART=antiretroviral therapy. TB=tuberculosis.

<sup>1</sup>Other reasons given (sic): lack of special NCD Unit, admission wards are not enough, few rooms to accommodate patients, restrictions in service provision according to level of health facility, no accommodation

<sup>2</sup>Other reasons given (sic): transportation improvement, updating training, poor community participation, poor environment (under tree), interaction between outreach activities with other school/participant activities, lack of population willingness to participate, poor response from community.

<sup>3</sup>Defined as in Table 1.

**Appendix Table 3.** Self-completed questionnaire results from 335 healthcare workers at 24 health facilities in north-west Tanzania, by health facility type.

|                                                                         | Referral hospitals (N=66) | District hospitals (N=110) | Urban health centers (N=35) | Rural health centers (N=57) | Urban dispensaries (N=50) | Rural dispensaries (N=17) |
|-------------------------------------------------------------------------|---------------------------|----------------------------|-----------------------------|-----------------------------|---------------------------|---------------------------|
| <b>Healthcare worker cadre</b>                                          |                           |                            |                             |                             |                           |                           |
| MD                                                                      | 29 (44%)                  | 4 (4%)                     | 0                           | 0                           | 1 (2%)                    | 0                         |
| Non-MD clinician                                                        | 7 (11%)                   | 24 (22%)                   | 8 (23%)                     | 13 (23%)                    | 12 (24%)                  | 4 (24%)                   |
| Nurse                                                                   | 25 (38%)                  | 57 (52%)                   | 19 (54%)                    | 23 (40%)                    | 20 (40%)                  | 6 (35%)                   |
| Assistant                                                               | 5 (8%)                    | 25 (23%)                   | 8 (23%)                     | 21 (37%)                    | 17 (34%)                  | 7 (41%)                   |
| <b>EXPERIENCE, LEVEL OF COMFORT AND SENSE OF EQUIPMENT AVAILABILITY</b> |                           |                            |                             |                             |                           |                           |
| <b>Seen &gt;5 patients in past 3m</b>                                   |                           |                            |                             |                             |                           |                           |
| Hypertension                                                            | 44 (67%)                  | 57 (52%)                   | 12 (35%)                    | 7 (12%)                     | 13 (26%)                  | 1 (6%)                    |
| Diabetes mellitus                                                       | 40 (61%)                  | 56 (51%)                   | 3 (9%)                      | 3 (5%)                      | 7 (14%)                   | 0                         |
| Heart failure                                                           | 27 (41%)                  | 17 (15%)                   | 0                           | 0                           | 3 (6%)                    | 0                         |
| COPD                                                                    | 9 (13%)                   | 18 (16%)                   | 6 (17%)                     | 3 (5%)                      | 3 (6%)                    | 0                         |
| Asthma                                                                  | 11 (17%)                  | 30 (27%)                   | 11 (31%)                    | 4 (7%)                      | 10 (20%)                  | 0                         |
| Epilepsy                                                                | 7 (11%)                   | 20 (18%)                   | 4 (11%)                     | 9 (16%)                     | 2 (4%)                    | 1 (6%)                    |
| HIV infection                                                           | 54 (82%)                  | 86 (78%)                   | 25 (71%)                    | 42 (74%)                    | 25 (50%)                  | 5 (29%)                   |
| <b>Very comfortable managing</b>                                        |                           |                            |                             |                             |                           |                           |
| Hypertension                                                            | 12 (18%)                  | 5 (5%)                     | 6 (17%)                     | 2 (4%)                      | 8 (16%)                   | 1 (6%)                    |
| Diabetes mellitus                                                       | 9 (14%)                   | 5 (5%)                     | 7 (20%)                     | 3 (5%)                      | 8 (16%)                   | 0                         |
| Chronic heart failure                                                   | 12 (18%)                  | 7 (6%)                     | 2 (6%)                      | 2 (4%)                      | 2 (4%)                    | 1 (6%)                    |
| COPD                                                                    | 5 (8%)                    | 6 (5%)                     | 5 (14%)                     | 2 (4%)                      | 5 (10%)                   | 0                         |
| Asthma                                                                  | 20 (30%)                  | 11 (10%)                   | 15 (43%)                    | 5 (9%)                      | 10 (20%)                  | 2 (12%)                   |
| Epilepsy                                                                | 13 (20%)                  | 8 (7%)                     | 4 (11%)                     | 2 (4%)                      | 9 (18%)                   | 1 (6%)                    |
| HIV infection                                                           | 17 (26%)                  | 9 (8%)                     | 10 (29%)                    | 3 (5%)                      | 12 (24%)                  | 1 (6%)                    |
| <b>Have necessary equipment to manage</b>                               |                           |                            |                             |                             |                           |                           |
| Hypertension                                                            | 8 (12%)                   | 6 (5%)                     | 10 (29%)                    | 9 (16%)                     | 12 (24%)                  | 1 (6%)                    |
| Diabetes mellitus                                                       | 11 (17%)                  | 12 (11%)                   | 6 (17%)                     | 3 (5%)                      | 13 (26%)                  | 0                         |
| HIV infection                                                           | 15 (23%)                  | 19 (17%)                   | 11 (31%)                    | 14 (25%)                    | 15 (30%)                  | 3 (18%)                   |
| <b>Have necessary drugs to manage</b>                                   |                           |                            |                             |                             |                           |                           |
| Hypertension                                                            | 11 (17%)                  | 16 (15%)                   | 12 (34%)                    | 10 (18%)                    | 14 (28%)                  | 1 (6%)                    |
| Diabetes mellitus                                                       | 19 (29%)                  | 13 (12%)                   | 5 (14%)                     | 4 (7%)                      | 7 (14%)                   | 0                         |
| HIV infection                                                           | 25 (38%)                  | 29 (26%)                   | 11 (31%)                    | 18 (32%)                    | 8 (16%)                   | 3 (18%)                   |
| <b>TRAINING AND SUPERVISION</b>                                         |                           |                            |                             |                             |                           |                           |
| <b>Chronic diseases excl HIV</b>                                        |                           |                            |                             |                             |                           |                           |
| <b>Training/advice from supervisor</b>                                  |                           |                            |                             |                             |                           |                           |
| In past year                                                            | 20 (32%)                  | 12 (11%)                   | 4 (12%)                     | 2 (4%)                      | 3 (6%)                    | 0                         |
| Before the last year                                                    | 3 (5%)                    | 9 (8%)                     | 6 (18%)                     | 5 (9%)                      | 4 (8%)                    | 2 (13%)                   |
| Never                                                                   | 40 (63%)                  | 88 (81%)                   | 23 (70%)                    | 48 (87%)                    | 43 (86%)                  | 14 (88%)                  |
| <b>Training/advice from higher department</b>                           |                           |                            |                             |                             |                           |                           |
| In past year                                                            | 12 (18%)                  | 9 (8%)                     | 1 (3%)                      | 4 (7%)                      | 3 (6%)                    | 1 (6%)                    |
| Before the last year                                                    | 0                         | 12 (11%)                   | 4 (11%)                     | 5 (9%)                      | 4 (8%)                    | 2 (12%)                   |
| Never                                                                   | 54 (82%)                  | 89 (81%)                   | 30 (86%)                    | 48 (84%)                    | 43 (86%)                  | 14 (82%)                  |
| <b>Training course</b>                                                  |                           |                            |                             |                             |                           |                           |
| In past year                                                            | 13 (20%)                  | 6 (5%)                     | 5 (14%)                     | 4 (7%)                      | 4 (8%)                    | 2 (12%)                   |
| Before the last year                                                    | 6 (9%)                    | 13 (12%)                   | 4 (11%)                     | 7 (12%)                     | 4 (8%)                    | 0                         |
| Never                                                                   | 47 (71%)                  | 91 (83%)                   | 26 (74%)                    | 46 (81%)                    | 42 (84%)                  | 15 (88%)                  |
| <b>HIV infection</b>                                                    |                           |                            |                             |                             |                           |                           |
| <b>Training/advice from supervisor</b>                                  |                           |                            |                             |                             |                           |                           |
| In past year                                                            | 22 (34%)                  | 17 (16%)                   | 9 (26%)                     | 12 (22%)                    | 9 (18%)                   | 6 (38%)                   |
| Before the last year                                                    | 12 (18%)                  | 35 (32%)                   | 6 (18%)                     | 13 (24%)                    | 9 (18%)                   | 3 (19%)                   |
| Never                                                                   | 31 (48%)                  | 57 (52%)                   | 19 (56%)                    | 30 (55%)                    | 31 (63%)                  | 7 (44%)                   |
| <b>Training/advice from higher department</b>                           |                           |                            |                             |                             |                           |                           |

|                              | Referral hospitals (N=66) | District hospitals (N=110) | Urban health centers (N=35) | Rural health centers (N=57) | Urban dispensaries (N=50) | Rural dispensaries (N=17) |
|------------------------------|---------------------------|----------------------------|-----------------------------|-----------------------------|---------------------------|---------------------------|
| In past year                 | 14 (22%)                  | 16 (15%)                   | 7 (20%)                     | 13 (23%)                    | 9 (18%)                   | 7 (41%)                   |
| Before the last year         | 14 (22%)                  | 30 (27%)                   | 7 (20%)                     | 14 (25%)                    | 8 (16%)                   | 2 (12%)                   |
| Never                        | 37 (57%)                  | 64 (58%)                   | 21 (60%)                    | 30 (53%)                    | 33 (66%)                  | 8 (47%)                   |
| <b>Training course</b>       |                           |                            |                             |                             |                           |                           |
| In past year                 | 12 (18%)                  | 5 (5%)                     | 4 (11%)                     | 6 (11%)                     | 8 (16%)                   | 5 (29%)                   |
| Before the last year         | 15 (23%)                  | 29 (26%)                   | 13 (37%)                    | 15 (26%)                    | 8 (16%)                   | 3 (18%)                   |
| Never                        | 38 (58%)                  | 76 (69%)                   | 18 (51%)                    | 36 (63%)                    | 34 (68%)                  | 9 (53%)                   |
| <b>KNOWLEDGE<sup>1</sup></b> |                           |                            |                             |                             |                           |                           |
| <b>Hypertension</b>          |                           |                            |                             |                             |                           |                           |
| Good                         | 21 (32%)                  | 9 (8%)                     | 4 (11%)                     | 3 (5%)                      | 2 (4%)                    | 0                         |
| Satisfactory                 | 31 (47%)                  | 47 (43%)                   | 23 (66%)                    | 27 (47%)                    | 22 (44%)                  | 9 (53%)                   |
| Poor                         | 14 (21%)                  | 54 (49%)                   | 8 (23%)                     | 27 (47%)                    | 26 (52%)                  | 8 (47%)                   |
| <b>Diabetes mellitus</b>     |                           |                            |                             |                             |                           |                           |
| Good                         | 15 (23%)                  | 13 (12%)                   | 2 (6%)                      | 1 (2%)                      | 2 (4%)                    | 1 (6%)                    |
| Satisfactory                 | 37 (56%)                  | 44 (40%)                   | 17 (49%)                    | 22 (39%)                    | 28 (56%)                  | 5 (29%)                   |
| Poor                         | 14 (21%)                  | 53 (48%)                   | 16 (46%)                    | 34 (60%)                    | 20 (40%)                  | 11 (65%)                  |
| <b>HIV infection</b>         |                           |                            |                             |                             |                           |                           |
| Good                         | 20 (30%)                  | 9 (8%)                     | 1 (3%)                      | 3 (5%)                      | 4 (8%)                    | 1 (6%)                    |
| Satisfactory                 | 37 (56%)                  | 68 (62%)                   | 29 (83%)                    | 41 (72%)                    | 35 (70%)                  | 13 (76%)                  |
| Poor                         | 9 (14%)                   | 33 (30%)                   | 5 (14%)                     | 13 (23%)                    | 11 (22%)                  | 3 (18%)                   |

Note: a few results are missing; percentages are of complete data.

<sup>1</sup>Based on answers to 10 questions about management of each disease. Good: 10/10; satisfactory: 7-9/10; poor: <7/10.

**Appendix Table 4.** Self-completed questionnaire results from 335 healthcare workers at 24 health facilities in north-west Tanzania, by healthcare worker cadre.

|                                                                         | MDs (N=34) | Non-MD clinicians (N=68) | Nurses (N=150) | Assistants (N=83) |
|-------------------------------------------------------------------------|------------|--------------------------|----------------|-------------------|
| <b>Type of facility</b>                                                 |            |                          |                |                   |
| Hospital (regional/referral)                                            | 29 (85%)   | 7 (10%)                  | 25 (17%)       | 5 (6%)            |
| District hospital                                                       | 4 (12%)    | 24 (35%)                 | 57 (38%)       | 25 (30%)          |
| Health center                                                           | 0          | 21 (31%)                 | 42 (28%)       | 29 (35%)          |
| Dispensary                                                              | 1 (3%)     | 16 (24%)                 | 26 (17%)       | 24 (29%)          |
| <b>EXPERIENCE, LEVEL OF COMFORT AND SENSE OF EQUIPMENT AVAILABILITY</b> |            |                          |                |                   |
| <b>Seen &gt;5 patients in past 3m</b>                                   |            |                          |                |                   |
| Hypertension                                                            | 31 (91%)   | 33 (49%)                 | 50 (33%)       | 20 (24%)          |
| Diabetes mellitus                                                       | 31 (91%)   | 24 (35%)                 | 31 (21%)       | 23 (28%)          |
| Heart failure                                                           | 26 (76%)   | 5 (7%)                   | 11 (7%)        | 5 (6%)            |
| COPD                                                                    | 8 (24%)    | 7 (10%)                  | 15 (10%)       | 9 (11%)           |
| Asthma                                                                  | 6 (18%)    | 20 (29%)                 | 25 (17%)       | 15 (18%)          |
| Epilepsy                                                                | 1 (3%)     | 17 (25%)                 | 16 (11%)       | 9 (11%)           |
| HIV infection                                                           | 32 (94%)   | 45 (66%)                 | 111 (74%)      | 49 (59%)          |
| <b>Very comfortable managing</b>                                        |            |                          |                |                   |
| Hypertension                                                            | 10 (29%)   | 11 (16%)                 | 8 (5%)         | 5 (6%)            |
| Diabetes mellitus                                                       | 11 (32%)   | 8 (12%)                  | 6 (4%)         | 7 (8%)            |
| Chronic heart failure                                                   | 11 (32%)   | 6 (9%)                   | 7 (5%)         | 2 (2%)            |
| COPD                                                                    | 5 (16%)    | 10 (15%)                 | 4 (3%)         | 4 (5%)            |
| Asthma                                                                  | 11 (32%)   | 21 (31%)                 | 25 (17%)       | 6 (7%)            |
| Epilepsy                                                                | 11 (33%)   | 13 (19%)                 | 9 (6%)         | 4 (5%)            |
| HIV infection                                                           | 10 (29%)   | 10 (15%)                 | 21 (14%)       | 11 (13%)          |
| <b>Have necessary equipment to manage</b>                               |            |                          |                |                   |
| Hypertension                                                            | 6 (18%)    | 14 (21%)                 | 15 (10%)       | 11 (13%)          |
| Diabetes mellitus                                                       | 9 (26%)    | 10 (15%)                 | 12 (8%)        | 14 (17%)          |
| HIV infection                                                           | 7 (21%)    | 16 (24%)                 | 34 (23%)       | 20 (24%)          |
| <b>Have necessary drugs to manage</b>                                   |            |                          |                |                   |
| Hypertension                                                            | 10 (29%)   | 16 (24%)                 | 25 (17%)       | 13 (16%)          |
| Diabetes mellitus                                                       | 18 (53%)   | 8 (12%)                  | 12 (8%)        | 10 (12%)          |
| HIV infection                                                           | 12 (35%)   | 22 (32%)                 | 42 (28%)       | 18 (22%)          |
| <b>TRAINING AND SUPERVISION</b>                                         |            |                          |                |                   |

|                                               | MDs (N=34) | Non-MD clinicians (N=68) | Nurses (N=150) | Assistants (N=83) |
|-----------------------------------------------|------------|--------------------------|----------------|-------------------|
| <b>Chronic diseases excl HIV</b>              |            |                          |                |                   |
| <b>Training/advice from supervisor</b>        |            |                          |                |                   |
| In past year                                  | 14 (44%)   | 14 (22%)                 | 11 (7%)        | 2 (2%)            |
| Before the last year                          | 0          | 9 (14%)                  | 14 (9%)        | 6 (7%)            |
| Never                                         | 18 (56%)   | 40 (63%)                 | 124 (83%)      | 74 (90%)          |
| <b>Training/advice from higher department</b> |            |                          |                |                   |
| In past year                                  | 6 (17%)    | 10 (15%)                 | 12 (8%)        | 2 (2%)            |
| Before the last year                          | 0          | 9 (13%)                  | 10 (7%)        | 8 (10%)           |
| Never                                         | 28 (82%)   | 49 (72%)                 | 128 (85%)      | 73 (88%)          |
| <b>Training course</b>                        |            |                          |                |                   |
| In past year                                  | 10 (29%)   | 10 (15%)                 | 12 (8%)        | 2 (2%)            |
| Before the last year                          | 4 (12%)    | 11 (16%)                 | 10 (7%)        | 9 (11%)           |
| Never                                         | 20 (59%)   | 47 (69%)                 | 128 (85%)      | 72 (87%)          |
| <b>HIV infection</b>                          |            |                          |                |                   |
| <b>Training/advice from supervisor</b>        |            |                          |                |                   |
| In past year                                  | 11 (33%)   | 18 (28%)                 | 36 (24%)       | 10 (12%)          |
| Before the last year                          | 4 (12%)    | 15 (23%)                 | 43 (29%)       | 16 (20%)          |
| Never                                         | 18 (55%)   | 31 (48%)                 | 71 (47%)       | 55 (68%)          |
| <b>Training/advice from higher department</b> |            |                          |                |                   |
| In past year                                  | 6 (18%)    | 17 (25%)                 | 35 (23%)       | 8 (10%)           |
| Before the last year                          | 1 (3%)     | 18 (26%)                 | 40 (27%)       | 16 (19%)          |
| Never                                         | 26 (79%)   | 33 (49%)                 | 75 (50%)       | 59 (71%)          |
| <b>Training course</b>                        |            |                          |                |                   |
| In past year                                  | 8 (18%)    | 11 (16%)                 | 22 (15%)       | 1 (1%)            |
| Before the last year                          | 5 (15%)    | 21 (31%)                 | 43 (29%)       | 14 (17%)          |
| Never                                         | 22 (67%)   | 36 (53%)                 | 85 (57%)       | 68 (82%)          |
| <b>KNOWLEDGE<sup>1</sup></b>                  |            |                          |                |                   |
| <b>Hypertension</b>                           |            |                          |                |                   |
| Good                                          | 15 (44%)   | 19 (28%)                 | 5 (3%)         | 0                 |
| Satisfactory                                  | 18 (53%)   | 36 (57%)                 | 80 (53%)       | 22 (27%)          |
| Poor                                          | 1 (3%)     | 10 (15%)                 | 65 (43%)       | 61 (73%)          |
| <b>Diabetes mellitus</b>                      |            |                          |                |                   |
| Good                                          | 13 (38%)   | 16 (24%)                 | 4 (3%)         | 1 (1%)            |
| Satisfactory                                  | 21 (62%)   | 39 (57%)                 | 70 (47%)       | 23 (28%)          |
| Poor                                          | 0          | 13 (19%)                 | 76 (51%)       | 59 (71%)          |
| <b>HIV infection</b>                          |            |                          |                |                   |
| Good                                          | 19 (56%)   | 10 (15%)                 | 8 (5%)         | 1 (1%)            |
| Satisfactory                                  | 14 (41%)   | 50 (74%)                 | 111 (74%)      | 48 (58%)          |
| Poor                                          | 1 (3%)     | 8 (12%)                  | 31 (21%)       | 34 (41%)          |

Note: a few results are missing; percentages are of complete data.

<sup>1</sup>Based on answers to 10 questions about management of each disease. Good: 10/10; satisfactory: 7-9/10; poor: <7/10.

## Appendix 5: Extract from the self-completed questionnaire for healthcare workers

Here we show the three case-based scenarios with ten knowledge questions for each. Correct answers are shown in bold.

### Case scenario A

Assume you are based in a rural dispensary or health center. A patient comes to see you at your clinic. He is 40 years old. He asks for treatment of frequent headache. He denies any history of fevers. The patient tells you that he had his blood pressure measured 1 month ago and it was 155/105. His body mass index is 29 kg / m<sup>2</sup>.

Please state whether the following statements are true or false.

| Question number | Question                                                                                                                                                                                                                                   |
|-----------------|--------------------------------------------------------------------------------------------------------------------------------------------------------------------------------------------------------------------------------------------|
| 301             | At the first visit it is important to ask about other symptoms, conduct a brief general examination, and take blood pressure (BP) on both arms.                                                                                            |
|                 | 1. <b>True</b><br>2. False<br>3. I don't know                                                                                                                                                                                              |
| 302             | The headaches that this patient is experiencing are most likely due to malaria.                                                                                                                                                            |
|                 | 1. True<br>2. <b>False</b><br>3. I don't know                                                                                                                                                                                              |
| 303             | This patient probably does not have hypertension since hypertension is defined as a systolic blood pressure of greater than 160mmHg.                                                                                                       |
|                 | 1. True<br>2. <b>False</b><br>3. I don't know                                                                                                                                                                                              |
| 304             | High blood pressure can be a dangerous disease and therefore must only be managed in a well-equipped hospital (not a dispensary or a health center).                                                                                       |
|                 | 1. True<br>2. <b>False</b><br>3. I don't know                                                                                                                                                                                              |
| 305             | For patients with high blood pressure, it is important to educate them to not add salt to food, to reduce weight if he/she is overweight, and to perform regular exercise.                                                                 |
|                 | 1. <b>True</b><br>2. False<br>3. I don't know                                                                                                                                                                                              |
| 306             | If drug therapy is indicated for hypertension, the best, first-line therapy for most patients should be a thiazide diuretic drug, e.g. such as hydrochlorothiazide or bendrofluazide.                                                      |
|                 | 1. <b>True</b><br>2. False<br>3. I don't know                                                                                                                                                                                              |
| 307             | If the blood pressure remains greater than 160/100 mmHg with first-line therapy, the best course of action is to stop that drug and to start the patient on another drug like diazepam or frusemide.                                       |
|                 | 1. True<br>2. <b>False</b><br>3. I don't know                                                                                                                                                                                              |
| 308             | In patients with hypertension, medications can usually be stopped as soon as the blood pressure is normal.                                                                                                                                 |
|                 | 1. True<br>2. <b>False</b><br>3. I don't know                                                                                                                                                                                              |
| 309             | Possible serious complications of chronic, untreated high blood pressure include stroke, kidney failure, heart failure, infarction of the heart.                                                                                           |
|                 | 1. <b>True</b><br>2. False<br>3. I don't know                                                                                                                                                                                              |
| 310             | In the first year after being started on antihypertensive treatment, a person with hypertension only needs to return to clinic every 6 months in order to check blood pressure, receive further counseling and adjustments in medications. |
|                 | 1. True<br>2. <b>False</b><br>3. I don't know                                                                                                                                                                                              |

### Case scenario B

Assume you are based in a rural health center or dispensary. A patient comes to see you. She is 30 years old and in good general health. She recently tested HIV-positive with a single rapid HIV test. She feels weak and complains about diarrhea that has been present for 3 days but has no fever. When asked, she reports that she does not take cotrimoxazole (Septrim).

| Question number | Question                                                                                                                   |
|-----------------|----------------------------------------------------------------------------------------------------------------------------|
| 401             | In order to confirm the diagnosis of HIV in this patient, it is important to perform at least 2 different rapid HIV tests. |
|                 | 1. <b>True</b>                                                                                                             |

|     |                                                                                                                                                                                                                                                              |
|-----|--------------------------------------------------------------------------------------------------------------------------------------------------------------------------------------------------------------------------------------------------------------|
|     | 2. False<br>3. I don't know                                                                                                                                                                                                                                  |
| 402 | The most likely cause of diarrhea in this patient is malaria.                                                                                                                                                                                                |
|     | 1. True<br>2. <b>False</b><br>3. I don't know                                                                                                                                                                                                                |
| 403 | After confirmation of HIV infection, it is important to examine in order to establish disease stage, start the patient on cotrimoxazole, educate on healthy life style, conduct CD4 test or refer for CD4 test to the nearest center where this can be done. |
|     | 1. <b>True</b><br>2. False<br>3. I don't know                                                                                                                                                                                                                |
| 404 | HIV can be a dangerous disease and therefore must only be managed in a well-equipped hospital (not a health center or dispensary).                                                                                                                           |
|     | 1. True<br>2. <b>False</b><br>3. I don't know                                                                                                                                                                                                                |
| 405 | For patients with HIV, it is important to educate about healthy lifestyles, the importance of medication compliance and safe sexual practices.                                                                                                               |
|     | 1. <b>True</b><br>2. False<br>3. I don't know                                                                                                                                                                                                                |
| 406 | If this patient is confirmed to have WHO clinical stage 4 disease, antiretroviral drugs should only be started if the CD4 count is less than 200 cells / mm <sup>3</sup> .                                                                                   |
|     | 1. True<br>2. <b>False</b><br>3. I don't know                                                                                                                                                                                                                |
| 407 | If antiretroviral therapy is indicated, a combination of zidovudine, lamivudine and lopinavir (a protease-inhibitor) is a reasonable first-line treatment.                                                                                                   |
|     | 1. True<br>2. <b>False</b><br>3. I don't know                                                                                                                                                                                                                |
| 408 | In patients with HIV, medications can usually be stopped as soon as the CD4 count is normal.                                                                                                                                                                 |
|     | 1. True<br>2. <b>False</b><br>3. I don't know                                                                                                                                                                                                                |
| 409 | Possible serious complications of chronic, untreated HIV infection include tuberculosis, chronic diarrhea, severe weight loss and cryptococcal meningitis.                                                                                                   |
|     | 1. <b>True</b><br>2. False<br>3. I don't know                                                                                                                                                                                                                |
| 410 | In the first year after being started on antiretroviral treatment, a person with HIV only needs to return to clinic every 6 months in order to receive further counseling and adjustments in medications.                                                    |
|     | 1. True<br>2. <b>False</b><br>3. I don't know                                                                                                                                                                                                                |

### Case scenario C

Assume you are based in a rural health center or dispensary. A patient comes to see you. He is 40 years old. His height is about 165 cm, his body weight is about 90 kg. He smokes about 10 cigarettes a day. He seeks help because of frequent dizziness. When asked about any other problems he mentions frequent thirst and frequent need to urinate, also during the night.

| Question number | Question                                                                                                                                                                |
|-----------------|-------------------------------------------------------------------------------------------------------------------------------------------------------------------------|
| 501             | At the first visit, the most important investigation that you can perform is a malaria smear.                                                                           |
|                 | 1. True<br>2. <b>False</b><br>3. I don't know                                                                                                                           |
| 502             | The frequent thirst and frequent need to urinate in this patient may be due to type 2 diabetes mellitus.                                                                |
|                 | 1. <b>True</b><br>2. False<br>3. I don't know                                                                                                                           |
| 503             | Diabetes mellitus is diagnosed when a patient has symptoms of diabetes mellitus and a fasting blood glucose of >7.0mmol/L and/or a random blood glucose of >11.1mmol/L. |
|                 | 1. <b>True</b><br>2. False<br>3. I don't know                                                                                                                           |
| 504             | Diabetes mellitus can be a dangerous disease and therefore must only be managed in a well-equipped hospital (not a health center or dispensary).                        |
|                 | 1. True                                                                                                                                                                 |

|     |                                                                                                                                                                                                                                                 |
|-----|-------------------------------------------------------------------------------------------------------------------------------------------------------------------------------------------------------------------------------------------------|
|     | <p>2. <b>False</b></p> <p>3. I don't know</p>                                                                                                                                                                                                   |
| 505 | If this patient has diabetes mellitus, it is important to educate him to reduce intake of sugars such as soda and candy or sweets, to reduce weight, to stop smoking and to perform regular exercise.                                           |
|     | <p>1. <b>True</b></p> <p>2. False</p> <p>3. I don't know</p>                                                                                                                                                                                    |
| 506 | If drug therapy is indicated for type 2 diabetes mellitus, the best, first-line therapy for most patients should be an oral medicine such as metformin.                                                                                         |
|     | <p>1. <b>True</b></p> <p>2. False</p> <p>3. I don't know</p>                                                                                                                                                                                    |
| 507 | In persons with diabetes mellitus, it is very important that the blood glucose level should not go below 12mmol/L as this could cause symptoms of hypoglycemia (low blood sugar).                                                               |
|     | <p>1. True</p> <p>2. <b>False</b></p> <p>3. I don't know</p>                                                                                                                                                                                    |
| 508 | In patients with diabetes mellitus type 2, medications can usually be stopped as soon as the blood sugar is normal.                                                                                                                             |
|     | <p>1. True</p> <p>2. <b>False</b></p> <p>3. I don't know</p>                                                                                                                                                                                    |
| 509 | Common complications of chronic, untreated diabetes mellitus include chronic lung disease (emphysema), liver cancer and blindness.                                                                                                              |
|     | <p>1. True</p> <p>2. <b>False</b></p> <p>3. I don't know</p>                                                                                                                                                                                    |
| 510 | In the first year after being started on anti-diabetic treatment, a person with diabetes mellitus only needs to return to clinic every 6 months in order to check their blood sugar, receive further counseling and adjustments in medications. |
|     | <p>1. True</p> <p>2. <b>False</b></p> <p>3. I don't know</p>                                                                                                                                                                                    |
